# Supplementary material for: Characterization of phenolic constituents in Lithocarpus polystachyus
Source: Royal Society of Chemistry journal article supplement (doi:10.1039/c3ay41288a), 2013-12-04
Supplement: c3ay41288a.pdf [file c3ay41288a.pdf]

## Characterization of phenolic constituents in *Lithocarpus polystachyus*

Ya Zhao,<sup>a</sup> Xiong Li,<sup>b</sup> Xing Zeng,<sup>b</sup> Song Huang<sup>a</sup>, Shaozhen Hou<sup>a</sup> and Xiaoping Lai<sup>a,\*</sup>

Ya Zhao and Xiong Li contributed equally to this work

**Figure S1:** UHPLC-PAD/ESI-MS<sup>n</sup> analysis of the leaves of *L. polystachyus*: (a) UHPLC-PAD chromatography; (b) ESI-MS total ion current (TIC) profile of *L. polystachyus*; and (c) ESI-MS extract ion current (EIC) of some trace constituents

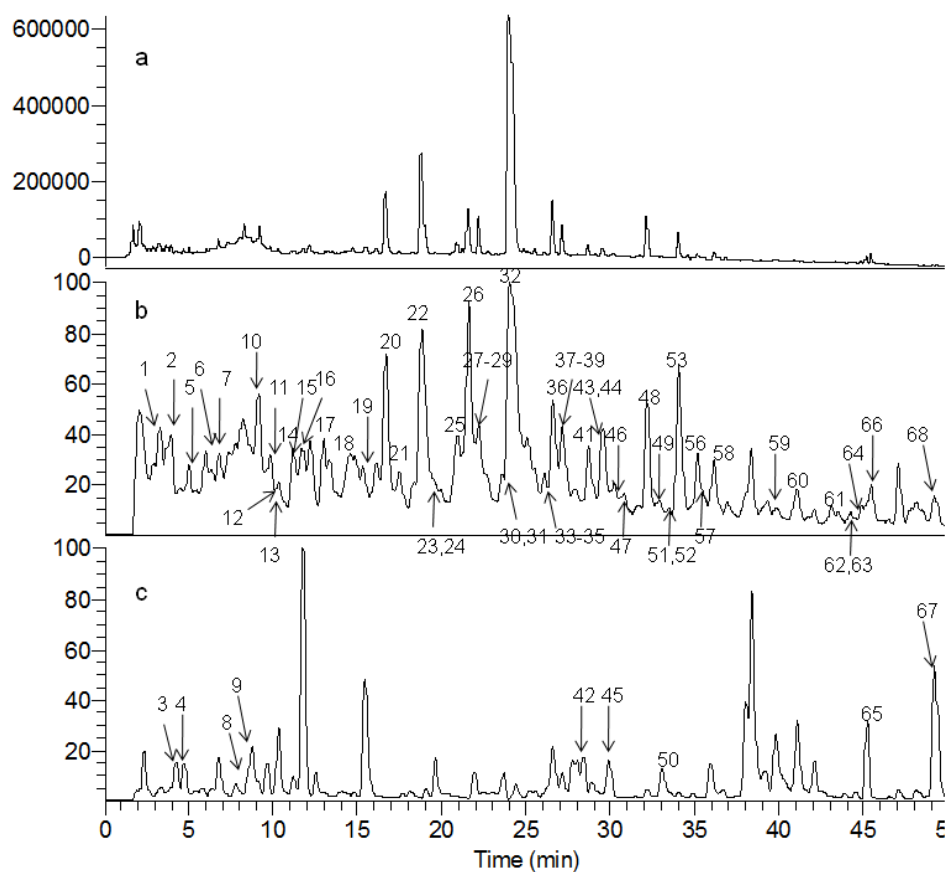

**Figure S2:** UPLC-PAD/ESI-MS analysis of the mixture of 16 standards. (a) UPLC-PAD chromatography; (b) ESI-MS total ion current (TIC)

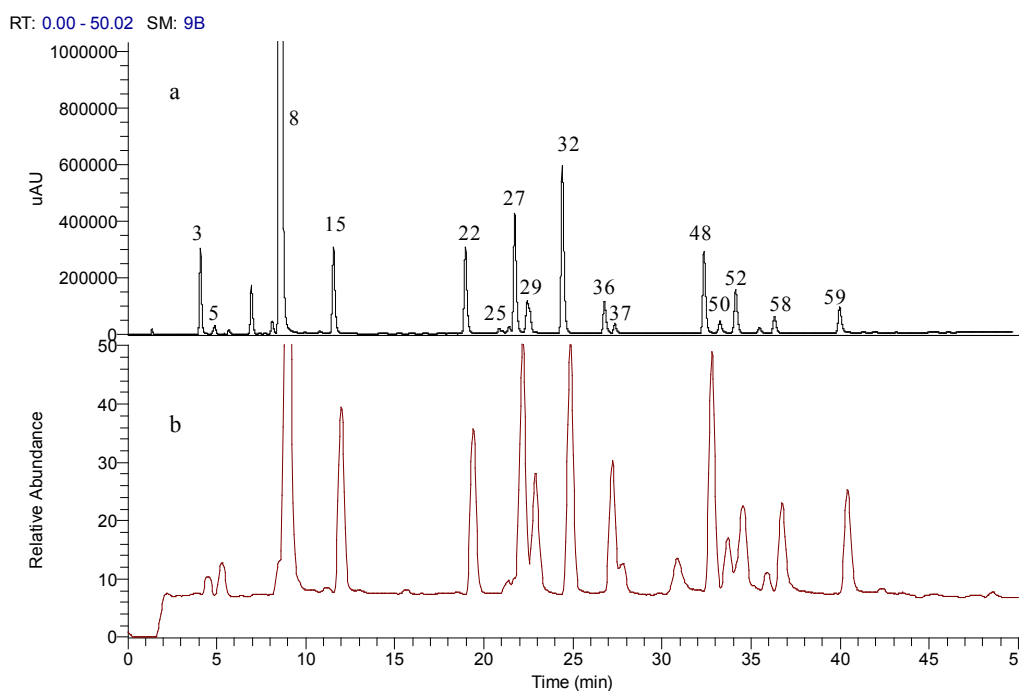

**Figure S3:** MS/MS product ion mass spectra of Luteolin-4'-*O*-rhamnosyl (1→2) glycoside (**18**,  $m/z$  593)

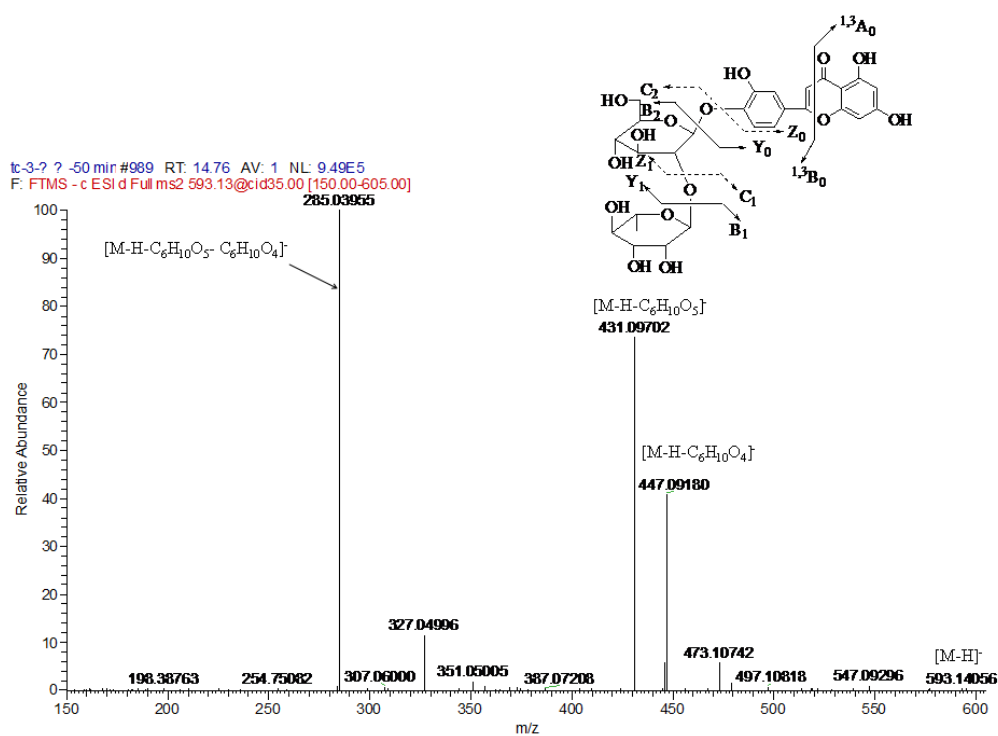

**Figure S4:** MS/MS product ion mass spectra of phlorizin -di-*O*-glucoside (**20**, *m/z* 597)

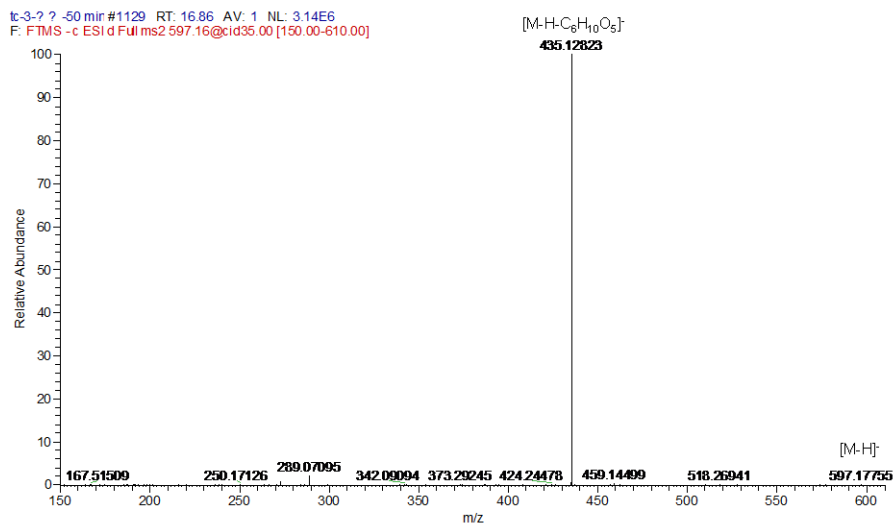

**Figure S5:** MS/MS product ion mass spectra of phloretin-2-*O*-[ $\beta$ -D-apiofuranosyl(1 $\rightarrow$ 6)- $\beta$ -D-glucopyranoside (**27**, *m/z* 567)

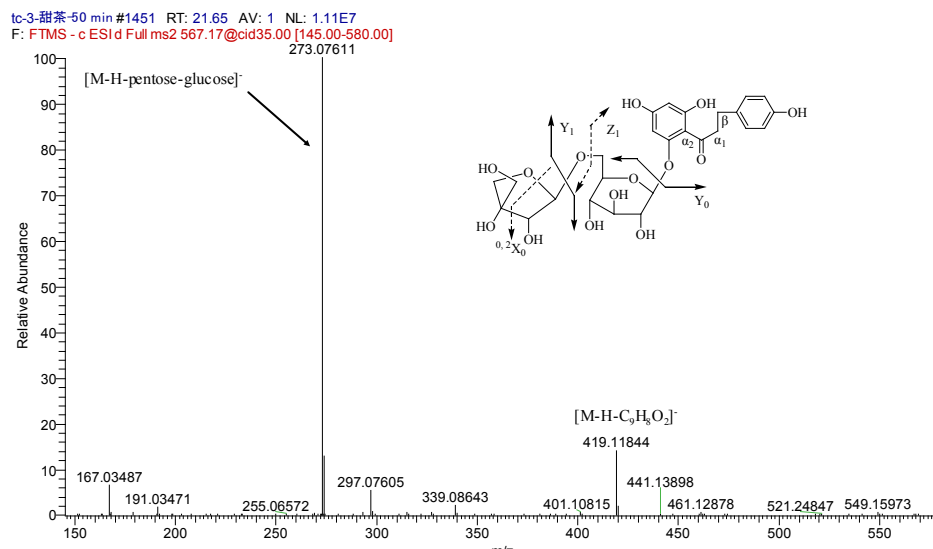

**Figure S6:** MS/MS product ion mass spectra of phloretin-2-*O*-coumaroyl- glucoside (**61**, *m/z* 581)

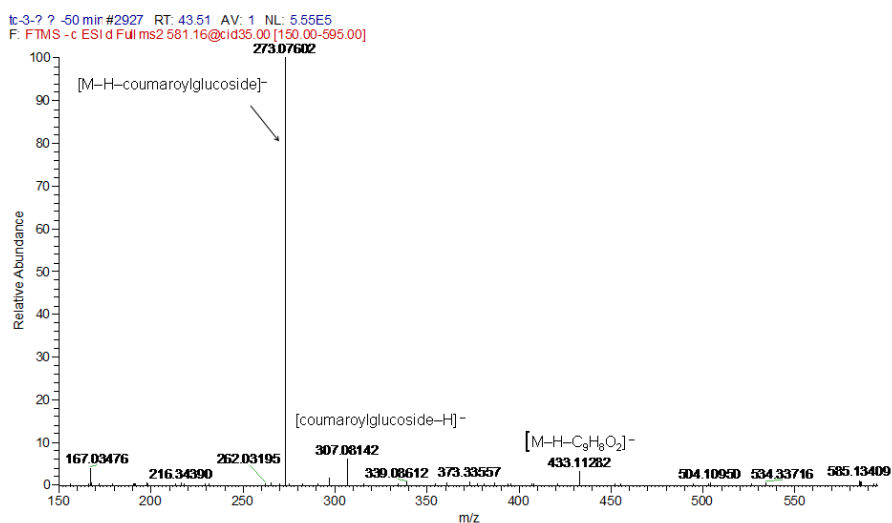

**Table S1.** Characterization of phenolic constituents of *L. polystachyus* by UHPLC-PAD/ESI-MS<sup>n</sup>

| No.                     | t <sub>R</sub><br>(min) | Observed<br>Mass | Calculated<br>Mass | Error<br>(ppm) | Formula                                         | LC/MS <sup>n</sup> data (% base peak)                                                                                                                                                                    | Identification                                         |
|-------------------------|-------------------------|------------------|--------------------|----------------|-------------------------------------------------|----------------------------------------------------------------------------------------------------------------------------------------------------------------------------------------------------------|--------------------------------------------------------|
| <b>1<sup>b</sup></b>    | 3.2                     | 315.07224        | 315.07216          | -2.1           | C <sub>13</sub> H <sub>15</sub> O <sub>9</sub>  | MS <sup>2</sup> [315]153.01921(100) MS <sup>3</sup> [315→153]109.0(100)                                                                                                                                  | Protocatechuic acid hexoside                           |
| <b>2<sup>b</sup></b>    | 3.9                     | 447.11359        | 447.11441          | 0.5            | C <sub>18</sub> H <sub>23</sub> O <sub>13</sub> | MS <sup>2</sup> [447]315.07114(100),271.08151 (59); MS <sup>3</sup> [447→315] 153.0(100)                                                                                                                 | Dihydroxybenzoic acid hexoside<br>pentoside            |
| <b>3<sup>a,b</sup></b>  | 4.2                     | 153.01936        | 153.01933          | 2.8            | C <sub>7</sub> H <sub>5</sub> O <sub>4</sub>    | MS <sup>2</sup> [153]109.02959 (100)                                                                                                                                                                     | Protocatechuic acid                                    |
| <b>4<sup>b</sup></b>    | 4.7                     | 371.09760        | 371.09837          | 0.5            | C <sub>16</sub> H <sub>19</sub> O <sub>10</sub> | MS <sup>2</sup> [371]325.09177(43), 163.03984(100); MS <sup>3</sup> [325→163] 119.1(100)                                                                                                                 | phenolic acid hexoside                                 |
| <b>5<sup>a,b</sup></b>  | 5.0                     | 289.07126        | 289.07176          | -1.7           | C <sub>15</sub> H <sub>13</sub> O <sub>6</sub>  | MS <sup>2</sup> [289]245.08128(100), 205.05022(37),179.03470(14)                                                                                                                                         | Catechin                                               |
| <b>6<sup>b</sup></b>    | 6.7                     | 341.08704        | 341.08781          | -2.2           | C <sub>15</sub> H <sub>17</sub> O <sub>9</sub>  | MS <sup>2</sup> [341]179.03464(100), 135.04509(8)                                                                                                                                                        | Caffeic acid hexoside                                  |
| <b>7<sup>b</sup></b>    | 6.8                     | 325.09225        | 325.09289          | 1.0            | C <sub>15</sub> H <sub>17</sub> O <sub>8</sub>  | MS <sup>2</sup> [341]163.03986(100), 119.05030(12)                                                                                                                                                       | <i>p</i> -comaroylhexoside                             |
| <b>8<sup>a,b</sup></b>  | 8.5                     | 179.03481        | 179.03498          | 2.3            | C <sub>9</sub> H <sub>7</sub> O <sub>4</sub>    | MS <sup>2</sup> [179] 135.04506(100)                                                                                                                                                                     | Caffeoyl acid                                          |
| <b>9<sup>b</sup></b>    | 8.8                     | 449.10822        | 449.10894          | -2.1           | C <sub>21</sub> H <sub>21</sub> O <sub>11</sub> | MS <sup>2</sup> [449]287.05515(100), 269.04 468 (30), 259.06042 (33);MS <sup>2</sup> [449→287] 269.1(5),<br>259.1(100), 243.2 (15)                                                                       | flavanonol-7- <i>O</i> -hexoside 1                     |
| <b>10<sup>b</sup></b>   | 8.9                     | 341.08701        | 341.08781          | -2.4           | C <sub>15</sub> H <sub>17</sub> O <sub>9</sub>  | MS <sup>2</sup> [341] 179.03464(100);MS <sup>3</sup> [341→179] 135.0(100)                                                                                                                                | Caffeoyl hexoside                                      |
| <b>11<sup>b</sup></b>   | 9.6                     | 449.10803        | 449.10894          | -2.0           | C <sub>21</sub> H <sub>21</sub> O <sub>11</sub> | MS <sup>2</sup> [449]287.05524(33), 269.04474 (100), 259.06049(40); MS <sup>3</sup> [449→287] 269.1(6),<br>259.1(100), 243.2(18)                                                                         | flavanonol-7- <i>O</i> -hexoside 2                     |
| <b>12<sup>b</sup></b>   | 10.2                    | 337.09210        | 337.09289          | -2.4           | C <sub>16</sub> H <sub>17</sub> O <sub>8</sub>  | MS <sup>2</sup> [337]191.05571(100), 173.04530 (7), 163.03986 (6)                                                                                                                                        | 5- <i>p</i> -coumaroylquinic acid                      |
| <b>13<sup>b</sup></b>   | 10.3                    | 449.10782        | 449.10894          | 0.5            | C <sub>21</sub> H <sub>21</sub> O <sub>11</sub> | MS <sup>2</sup> [449]287.05511(100); MS <sup>3</sup> [449→287] 151.1(100)                                                                                                                                | Eriodictyol hexoside 1                                 |
| <b>14<sup>b</sup></b>   | 11.1                    | 609.14478        | 609.14611          | -2.4           | C <sub>27</sub> H <sub>29</sub> O <sub>16</sub> | MS <sup>2</sup> [609] 489.10178(10), 463. 08676 (50), 462.07883 (25), 447.09186 (100),<br>301.03442(33), 285.03958(10)<br>MS <sup>3</sup> [609→447]327.2(17), 300.1(32), 284.1(100), 255.1(18), 150.9(4) | Quercetin7- <i>O</i> -hexoside-3- <i>O</i> -rhamnoside |
| <b>15<sup>a,b</sup></b> | 11.4                    | 335.07660        | 335.07669          | -2.0           | C <sub>16</sub> H <sub>15</sub> O <sub>8</sub>  | MS <sup>2</sup> [335]179.03470(100), 135.04515(23)                                                                                                                                                       | 5- <i>O</i> -caffeoylshikimic acid                     |
| <b>16<sup>b</sup></b>   | 11.8                    | 449.10818        | 449.10894          | 0.6            | C <sub>21</sub> H <sub>21</sub> O <sub>11</sub> | MS <sup>2</sup> [449] 287.05521(100); MS <sup>3</sup> [449→287] 151.0(100)                                                                                                                               | Eriodictyol hexoside 2                                 |
| <b>17<sup>b</sup></b>   | 13.5                    | 163.04002        | 163.04007          | -0.4           | C <sub>9</sub> H <sub>7</sub> O <sub>3</sub>    | MS <sup>2</sup> [163] 119.05023(100)                                                                                                                                                                     | Coumaric acid                                          |
| <b>18<sup>b</sup></b>   | 14.8                    | 593.14966        | 593.15119          | -2.3           | C <sub>27</sub> H <sub>29</sub> O <sub>15</sub> | MS <sup>2</sup> [593]473.10751(6), 447.09186 (41), 431.09708(71), 327.04996(11),                                                                                                                         | Luteolin-4'- <i>O</i> -rhamnosyl(1→2)glycoside         |

|                          |      |           |           |      |                                                 |                                                                                                                                                                                                                 |                                                                    |
|--------------------------|------|-----------|-----------|------|-------------------------------------------------|-----------------------------------------------------------------------------------------------------------------------------------------------------------------------------------------------------------------|--------------------------------------------------------------------|
|                          |      |           |           |      |                                                 | 285.03958(100); MS <sup>3</sup> [593→285]: 267.1(40), 257.0 (19), 255.2(24), 243.0 (76), 239.1 (47), 229.2 (100), 213.2 (69), 211.1 (24), 199.1 (29), 187.1 (25), 185.1 (33), 169.1(37), 163.1 (17), 151.1 (23) |                                                                    |
| <b>19</b> <sup>b</sup>   | 15.4 | 449.10904 | 449.10894 | 0.2  | C <sub>21</sub> H <sub>21</sub> O <sub>11</sub> | MS <sup>2</sup> [449]287.05557(100); MS <sup>3</sup> [449→287] 151.0(100)                                                                                                                                       | Eriodictyol hexoside 3                                             |
| <b>20</b> <sup>b</sup>   | 16.9 | 597.18256 | 597.18249 | 0.1  | C <sub>27</sub> H <sub>33</sub> O <sub>15</sub> | MS <sup>2</sup> [597]:435.12888 (100); MS <sup>3</sup> [597→435]: 273.0(100), 167.0(26)                                                                                                                         | Phlorizin -di- <i>O</i> -glucoside                                 |
| <b>21</b> <sup>b</sup>   | 18.3 | 597.18280 | 597.18249 | 0.5  | C <sub>27</sub> H <sub>33</sub> O <sub>15</sub> | MS <sup>2</sup> [597] 449.12857(5), 297.07590 (2), 273.07648 (100); MS <sup>3</sup> [597→273] 167.1(100)                                                                                                        | Phloretin-2- <i>O</i> -glucosyl (1→6) glucoside                    |
| <b>22</b> <sup>a</sup>   | 18.8 | 451.12439 | 451.12459 | -0.1 | C <sub>21</sub> H <sub>23</sub> O <sub>11</sub> | MS <sup>2</sup> [451]289.07126(100); MS <sup>3</sup> [451→289]271.2(100), 245.2(18), 167.1(95),125.0(43)                                                                                                        | 3-Hydroxyphlorizin                                                 |
| <b>23</b> <sup>b</sup>   | 19.1 | 447.09238 | 447.09329 | -2.0 | C <sub>21</sub> H <sub>19</sub> O <sub>11</sub> | MS <sup>2</sup> [447]327.05011(10), 285.03964(100); MS <sup>3</sup> [447→285]267(14), 257(19), 243(24), 241(100), 217(31), 213(23), 201(11), 199(40), 175(32), 151(19)                                          | Luteolin -4'- <i>O</i> - hexoside                                  |
| <b>24</b> <sup>b</sup>   | 19.2 | 597.18097 | 597.18249 | 0.7  | C <sub>27</sub> H <sub>33</sub> O <sub>15</sub> | MS <sup>2</sup> [597] 449.12878(3), 297.07602(1), 273.07608(100) ; MS <sup>3</sup> [597→273] 167.1                                                                                                              | Phloretin-4- <i>O</i> -glucosyl(1→6)glucoside                      |
| <b>25</b> <sup>a,b</sup> | 20.7 | 433.11337 | 433.11347 | -1.5 | C <sub>21</sub> H <sub>21</sub> O <sub>10</sub> | MS <sup>2</sup> [433]271.06046(100)                                                                                                                                                                             | Naringin                                                           |
| <b>26</b> <sup>b</sup>   | 21.5 | 463.08859 | 463.08820 | 0.8  | C <sub>21</sub> H <sub>19</sub> O <sub>12</sub> | MS <sup>2</sup> [463]301.03488(100), 300.02670 (34); MS <sup>3</sup> [463→301] 179.0 (100), 151.0 (69)                                                                                                          | Quercetin 7- <i>O</i> - hexoside                                   |
| <b>27</b> <sup>ac</sup>  | 21.6 | 567.17163 | 567.17193 | -0.5 | C <sub>26</sub> H <sub>31</sub> O <sub>14</sub> | MS <sup>2</sup> [567]419.11844 (14), 297.07605 (5), 273.07654(100), 167.03487(7); MS <sup>3</sup> [567→273] 167.1(100)                                                                                          | Phloretin-2- <i>O</i> -[β-D-apiofuranosyl(1→6)-β-D-glucopyranoside |
| <b>28</b> <sup>b</sup>   | 21.7 | 581.18591 | 581.18758 | -2.9 | C <sub>27</sub> H <sub>33</sub> O <sub>14</sub> | MS <sup>2</sup> [581] 433.13397 (3), 297.07596 (1), 273.07593 (100), 167.03481(4)                                                                                                                               | Phloretin rhamnosyl(1→6) glucoside                                 |
| <b>29</b> <sup>a</sup>   | 22.2 | 463.08817 | 463.08820 | -0.1 | C <sub>21</sub> H <sub>19</sub> O <sub>12</sub> | MS <sup>2</sup> [463]301.03488 (100), 300.02692 (25); MS <sup>3</sup> [463→301] 179.0 (100) ,151.1(73)                                                                                                          | Quercetin 7- <i>O</i> -β-glucoside                                 |
| <b>30</b>                | 23.2 | 433.07672 | 433.07709 | -2.1 | C <sub>20</sub> H <sub>17</sub> O <sub>11</sub> | MS <sup>2</sup> [433]301.03439(100), 300.02658(19); MS <sup>3</sup> [433→301]283(19), 273(19), 257(14), 255(7), 193(7), 179(100), 151(71)                                                                       | Quercetin-3- <i>O</i> -arabinofuranoside                           |
| <b>31</b>                | 23.8 | 433.07697 | 433.07709 | -1.5 | C <sub>20</sub> H <sub>17</sub> O <sub>11</sub> | MS <sup>2</sup> [433] 301.03452(92), 300.02670(100)                                                                                                                                                             | Quercetin-3- <i>O</i> - arabinopyranoside                          |
| <b>32</b> <sup>a</sup>   | 24.2 | 435.12952 | 435.12967 | -0.3 | C <sub>21</sub> H <sub>23</sub> O <sub>10</sub> | MS <sup>2</sup> [435]273.07642 (100); MS <sup>3</sup> [435→273] 167.0(100)                                                                                                                                      | Phloridzin/ Phlorhizin                                             |
| <b>33</b> <sup>b</sup>   | 25.6 | 447.09344 | 447.09329 | 0.3  | C <sub>21</sub> H <sub>19</sub> O <sub>11</sub> | MS <sup>2</sup> [447]327.05014(18), 285.04010(60), 284.03226(100), 255.02939 (2); MS <sup>3</sup> [437→284] 256.1(17), 255.1(100)                                                                               | Kaempferol-3- <i>O</i> -hexoside                                   |
| <b>34</b> <sup>c</sup>   | 26.2 | 723.19324 | 723.19306 | 0.3  | C <sub>36</sub> H <sub>35</sub> O <sub>16</sub> | MS <sup>2</sup> [723]597.16034(33), 543.12878(92), 435.11230 (36), 391.08203 (100),                                                                                                                             | Unknown Phloretin conjugate                                        |

|                       |      |           |           |      |                                                 |                                                                                                                                                                                                                               |                                                  |
|-----------------------|------|-----------|-----------|------|-------------------------------------------------|-------------------------------------------------------------------------------------------------------------------------------------------------------------------------------------------------------------------------------|--------------------------------------------------|
| <b>35</b>             | 26.3 | 285.03986 | 285.03991 | -2.1 | C <sub>15</sub> H <sub>9</sub> O <sub>6</sub>   | 287.05569(30), 273.07663(45)<br>MS <sup>2</sup> [285]267.02927(17), 257.04480(51), 243.02934(30), 241.04991(67),<br>217.05020(50), 213.05525(35) 199.03966(100), 175.03981(65), 151.00352(38),<br>135.04507(20) 133.02934(14) | Luteolin                                         |
| <b>36<sup>a</sup></b> | 26.6 | 447.09329 | 447.09274 | 0    | C <sub>21</sub> H <sub>19</sub> O <sub>11</sub> | MS <sup>2</sup> [447]301.03491(100), 300.02667(26); MS <sup>3</sup> [447→301] 179.0(100), 151.0(67)                                                                                                                           | Quercitrin                                       |
| <b>37<sup>a</sup></b> | 27.2 | 447.09235 | 447.09274 | -2.5 | C <sub>21</sub> H <sub>19</sub> O <sub>11</sub> | MS <sup>2</sup> [447]327.05008(21), 285.03967(78), 284.03195(100), 255.02931(15)<br>MS <sup>3</sup> [447→285] 267.1 (18), 257.2 (39), 256.1(22), 255.1(100), 241.1(17), 239.1(7),<br>229.2(15), 227.2(10), 213.0(9),          | Kaempferol -3- <i>O</i> -glucoside               |
| <b>38<sup>b</sup></b> | 27.3 | 287.05560 | 287.05556 | -1.8 | C <sub>15</sub> H <sub>11</sub> O <sub>6</sub>  | MS <sup>2</sup> [287] 151.00354 (100)                                                                                                                                                                                         | Eriodictyol                                      |
| <b>39<sup>b</sup></b> | 27.3 | 447.09341 | 447.09329 | 0.3  | C <sub>21</sub> H <sub>19</sub> O <sub>11</sub> | MS <sup>2</sup> [447]301.03488(100), 300.02667 (21); MS <sup>3</sup> [447→301]179.0(100),151.0 (51)                                                                                                                           | Quercetin- <i>O</i> -rhamnoside                  |
| <b>40<sup>b</sup></b> | 28.5 | 493.13547 | 493.13515 | 1.8  | C <sub>23</sub> H <sub>25</sub> O <sub>12</sub> | MS <sup>2</sup> [493]433.11264(10), 289.07120 (100);MS <sup>3</sup> [493→289]271.2(77), 245.2(19), 167.2<br>(100), 125.0 (32)                                                                                                 | 3-hydroxy phloretin-2- <i>O</i> -acetyl hexoside |
| <b>41</b>             | 28.8 | 435.12881 | 435.12967 | 0.7  | C <sub>21</sub> H <sub>23</sub> O <sub>10</sub> | MS <sup>2</sup> [435]297.07599(17), 273.07605 (100);MS <sup>3</sup> [435→273] 167.0(100)                                                                                                                                      | Trilobatin                                       |
| <b>42<sup>b</sup></b> | 28.9 | 417.08212 | 417.08272 | -1.4 | C <sub>20</sub> H <sub>17</sub> O <sub>10</sub> | MS <sup>2</sup> [417]327.04999(11), 285.03970 (52), 284.03186(100);MS <sup>3</sup> [417→284]256.1(17),<br>255.1(100), 227.1(10)                                                                                               | Kaempferol pyranarabinoside                      |
| <b>43</b>             | 29.5 | 289.07123 | 289.07176 | -1.8 | C <sub>15</sub> H <sub>13</sub> O <sub>6</sub>  | MS <sup>2</sup> [289]271.06049(70), 245.08138(13), 167.03481(100), 125.02447(45)                                                                                                                                              | 3-hydroxy phloretin                              |
| <b>44</b>             | 29.6 | 477.13925 | 477.14024 | -2.1 | C <sub>23</sub> H <sub>25</sub> O <sub>11</sub> | MS <sup>2</sup> [477] 417.11826(16), 273.07623(100), 167.03494(6)                                                                                                                                                             | phloretin-2- <i>O</i> -acetyl hexoside           |
| <b>45<sup>b</sup></b> | 29.9 | 493.13535 | 493.13515 | 1.5  | C <sub>23</sub> H <sub>25</sub> O <sub>12</sub> | MS <sup>2</sup> [493]289.07144(100) MS <sup>3</sup> [493→289]271.1(74), 244.9(40), 167.2(100)                                                                                                                                 | 3-hydroxyphloretin-4- <i>O</i> -acetyl hexoside  |
| <b>46<sup>c</sup></b> | 30.3 | 521.13043 | 521.13006 | 1.8  | C <sub>24</sub> H <sub>25</sub> O <sub>13</sub> | MS <sup>2</sup> [521]477.13943(100), 273.07605 (12);MS <sup>3</sup> [521→477]435 (15), 273 (100),<br>178(17), 167(31)                                                                                                         | Phloretin-2- <i>O</i> -malonyl hexoside          |
| <b>47<sup>c</sup></b> | 31.5 | 551.17584 | 551.17647 | -2.1 | C <sub>26</sub> H <sub>31</sub> O <sub>13</sub> | MS <sup>2</sup> [551]493.13358(100), 435.12823(82), 417.11792(24),<br>273.07602(94);MS <sup>3</sup> [551→435] 273(100)                                                                                                        | Unknown Phloretin conjugate                      |
| <b>48<sup>a</sup></b> | 32.2 | 431.09833 | 431.09837 | 1.2  | C <sub>21</sub> H <sub>19</sub> O <sub>10</sub> | MS <sup>2</sup> [431]:285.03998(100), 284.03198(29), 255.02936(2);MS <sup>3</sup> [431→285]267(47),<br>257(100), 255.0(56), 241.1(32), 239.1(20), 229.1(50), 213.2 (25), 199.1(16), 197.2<br>(19), 163.0(17)                  | Afzelin                                          |
| <b>49<sup>c</sup></b> | 32.9 | 551.17596 | 551.17701 | 1.4  | C <sub>26</sub> H <sub>31</sub> O <sub>13</sub> | MS <sup>2</sup> [551]507.14981(45), 435.12900(97), 273.07645(100);MS <sup>3</sup> [551→273] 167.1(100)                                                                                                                        | Phloridzin monoacetin 1                          |

|                       |      |           |           |      |                                                 |                                                                                                                                                                  |                                          |
|-----------------------|------|-----------|-----------|------|-------------------------------------------------|------------------------------------------------------------------------------------------------------------------------------------------------------------------|------------------------------------------|
| <b>50<sup>a</sup></b> | 33.0 | 301.03476 | 301.03538 | 0.1  | C <sub>15</sub> H <sub>9</sub> O <sub>7</sub>   | MS <sup>2</sup> [301]178.99832(100), 151.00357(80)                                                                                                               | Quercetin                                |
| <b>51<sup>c</sup></b> | 33.5 | 521.12885 | 521.12952 | -2.1 | C <sub>24</sub> H <sub>25</sub> O <sub>13</sub> | MS <sup>2</sup> [521]477.13867(100), 297.07596(3), 273.07599 (41)                                                                                                | Phloridzin-4- <i>O</i> -malonyl hexoside |
| <b>52<sup>a</sup></b> | 33.8 | 271.06073 | 271.06120 | -1.7 | C <sub>15</sub> H <sub>11</sub> O <sub>5</sub>  | MS <sup>2</sup> [271]177.01903(24), 151.00354(100)                                                                                                               | Naringenin                               |
| <b>53</b>             | 34.0 | 477.13916 | 477.14024 | 1.0  | C <sub>23</sub> H <sub>25</sub> O <sub>11</sub> | MS <sup>2</sup> [477]417.11816(17), 273.07617(100), 167.03491(6)                                                                                                 | phloretin-4- <i>O</i> -acetyl hexoside   |
| <b>54<sup>c</sup></b> | 34.6 | 721.17517 | 721.17686 | -2.8 | C <sub>36</sub> H <sub>33</sub> O <sub>16</sub> | MS <sup>2</sup> [721]559.12250(100), 541.11218 (12), 285.03952(7)                                                                                                | Unknown Phloretin conjugate              |
| <b>55<sup>c</sup></b> | 34.9 | 551.17719 | 551.17701 | 0.3  | C <sub>26</sub> H <sub>31</sub> O <sub>13</sub> | MS <sup>2</sup> [551]507.14981(38), 435.12912(100), 273.07648(77); MS <sup>3</sup> [551→273] 167.1(100)                                                          | Phloridzin monoacetin 2                  |
| <b>56<sup>b</sup></b> | 35.2 | 477.14047 | 477.14024 | 1.6  | C <sub>23</sub> H <sub>25</sub> O <sub>11</sub> | MS <sup>2</sup> [477]273.07642(100), 167.03482(4)                                                                                                                | 6'' - <i>O</i> -Acetyltrilobatin         |
| <b>57<sup>c</sup></b> | 35.6 | 521.16522 | 521.16645 | -2.2 | C <sub>25</sub> H <sub>29</sub> O <sub>12</sub> | MS <sup>2</sup> [521]503.15421(35), 491.15442 (7), 273.07599(100)                                                                                                | Unknown phloretin conjugate              |
| <b>58<sup>a</sup></b> | 36.2 | 273.07718 | 273.07685 | 3.2  | C <sub>15</sub> H <sub>13</sub> O <sub>5</sub>  | MS <sup>2</sup> [273]167.03497(100), 125.02449(4), 123.04525(4)                                                                                                  | Phloretin                                |
| <b>59<sup>a</sup></b> | 39.8 | 285.03986 | 285.04046 | -2.2 | C <sub>15</sub> H <sub>9</sub> O <sub>6</sub>   | MS <sup>2</sup> [285]267.02945 (33), 257.04486 (98), 243.02942 (100), 241.05013(60),<br>229.05011(98) 213.05527 (86), 185.06058(86) 169.06567(93), 151.00352(99) | Kaempferol                               |
| <b>60<sup>c</sup></b> | 41.1 | 555.14972 | 555.15025 | -1.9 | C <sub>28</sub> H <sub>27</sub> O <sub>12</sub> | MS <sup>2</sup> [555]407.09729(3), 273.07602(100), 167.03479 (6)                                                                                                 | Unknown Phloretin conjugate              |
| <b>61<sup>c</sup></b> | 43.6 | 581.16498 | 581.16645 | -2.5 | C <sub>30</sub> H <sub>29</sub> O <sub>12</sub> | MS <sup>2</sup> [581]433.11282(3) 307.08151(6), 273.07602 (100); MS <sup>3</sup> [581→273] 167.1                                                                 | Phloretin-2- <i>O</i> -coumaroylhexoside |
| <b>62<sup>c</sup></b> | 44.2 | 611.17560 | 611.17701 | -2.3 | C <sub>31</sub> H <sub>31</sub> O <sub>13</sub> | MS <sup>2</sup> [611]463.12311(2), 337.09161(4), 273.07599(100); MS <sup>3</sup> [611→273] 167.1                                                                 | Phloretin-2- <i>O</i> - feruloylhexoside |
| <b>63<sup>c</sup></b> | 44.6 | 641.18591 | 641.18758 | -2.6 | C <sub>32</sub> H <sub>33</sub> O <sub>14</sub> | MS <sup>2</sup> [641]297.07602(20), 273.07602(100)                                                                                                               | Phloretin-2- <i>O</i> -sinapoylhexoside  |
| <b>64<sup>c</sup></b> | 44.9 | 581.16498 | 581.16645 | -2.5 | C <sub>30</sub> H <sub>29</sub> O <sub>12</sub> | MS <sup>2</sup> [581]433.11273(3), 307.08148(6), 273.07611(100); MS <sup>3</sup> [581→273] 167.1                                                                 | Phloretin-4- <i>O</i> -coumaroylhexoside |
| <b>65<sup>c</sup></b> | 45.2 | 641.18610 | 641.18758 | -2.3 | C <sub>32</sub> H <sub>33</sub> O <sub>14</sub> | MS <sup>2</sup> [641]273.07596(100), 493.13351(2), 367.10254 (6); MS <sup>3</sup> [641→273] 167.1                                                                | Phloretin-4- <i>O</i> -sinapoylhexoside  |
| <b>66<sup>c</sup></b> | 45.5 | 611.17578 | 611.17701 | -2.0 | C <sub>31</sub> H <sub>31</sub> O <sub>13</sub> | MS <sup>2</sup> [611]463.12292(2), 337.09174(3), 273.07599(100); MS <sup>3</sup> [611→273] 167.1                                                                 | Phloretin-4- <i>O</i> -feruloylhexoside  |
| <b>67<sup>c</sup></b> | 49.1 | 601.22754 | 601.22905 | -2.3 | C <sub>31</sub> H <sub>37</sub> O <sub>12</sub> | MS <sup>2</sup> [601]273.07599 (100); MS <sup>3</sup> [601→273] 167.0                                                                                            | Unknown Phloretin conjugate              |
| <b>68<sup>c</sup></b> | 49.2 | 601.22760 | 601.22905 | -2.4 | C <sub>31</sub> H <sub>37</sub> O <sub>12</sub> | MS <sup>2</sup> [601]273.07599(100); MS <sup>3</sup> [601→273] 167.0                                                                                             | Unknown Phloretin conjugate              |

<sup>a</sup>Compared with reference standards

<sup>b</sup>Firstly detected in this genus

<sup>c</sup>Identified as new compounds
